# Supplementary material for: Human in vivo-generated monocyte-derived dendritic cells and macrophages cross-present antigens through a vacuolar pathway
Source: PubMed Central journal article supplement (PMC6028641; doi:10.1038/s41467-018-04985-0), 2018-07-02
Supplement: 41467_2018_4985_MOESM3_ESM.pdf [file 41467_2018_4985_MOESM3_ESM.pdf]

## Description of Additional Supplementary Files

**File Name:** Supplementary Data 1

**Description:** Gene lists for selected gene signatures
